# Supplementary material
Source: HighWire-hosted journal article supplement (https://www.cmajopen.ca/highwire/filestream/90351/field_highwire_adjunct_files/0/open-2022-0163-1-at.pdf)
Supplement: open-2022-0163-1-at.pdf [file open-2022-0163-1-at.pdf]

**Supplementary Table 1: Description sources of each data point.**

| <b>Data Source</b>                                | <b>Description</b>                                                                                                                                                                                                                                                                                                                                                                                                                                                          | <b>Usage</b>                                                                                                                                                                                                  |
|---------------------------------------------------|-----------------------------------------------------------------------------------------------------------------------------------------------------------------------------------------------------------------------------------------------------------------------------------------------------------------------------------------------------------------------------------------------------------------------------------------------------------------------------|---------------------------------------------------------------------------------------------------------------------------------------------------------------------------------------------------------------|
| Discharge Abstract Database (DAD)                 | Captures inpatient hospitalizations in Alberta with a most responsible diagnosis and up to 24 secondary diagnoses coded using ICD-10 codes assigned by trained nosologists according to criteria developed by the Canadian Institute for Health Information (CIHI). Additionally contains relevant dates of hospitalization and procedures/interventions captured using the Canadian Classification of Health Intervention (CCI) codes. Data is available since April 2002. | Used to define children with any inpatient encounter having the ICD-10 code list in Supplementary Table 2 in any of the 25 diagnosis fields.                                                                  |
| National Ambulatory Care Reporting System (NACRS) | NACRS captures all emergency department visits in Alberta including visit dates and a primary diagnosis with up to 9 secondary diagnoses coded using ICD-10 codes similarly to DAD, as well as procedures captured using CCI codes. Data is available since April 2002.                                                                                                                                                                                                     | Used to define children with any ED visit encounter having the ICD-10 code list in Supplementary Table 2 in any of the 10 diagnosis fields.                                                                   |
| Pharmaceutical Information Network (PIN)          | PIN captures drug dispensations from community pharmacies in Alberta and includes the date of dispensation, Drug Identification Number (DIN), Anatomic Therapeutic Chemical (ATC) code, quantity of drug dispensed and the days supply dispensed. Data is reliably available since April 2008.                                                                                                                                                                              | Used to define statin dispensation from community pharmacies in Alberta any time during the follow-up period. Statin is defined by using the ATC codes, C10AA02, C10AA03, C10AA04, C10AA01, C10AA05, C10AA07. |
| Laboratory data (LAB)                             | Lab data was obtained from AHS lab systems that captures lab tests done in all settings (i.e. community as well as in-hospital) including date of test and results. Data is reliably available since April 2012.                                                                                                                                                                                                                                                            | Used to define the lipid panel.                                                                                                                                                                               |
| Vital Statistics                                  | Vital Statistics captures deaths within Alberta including date of death.                                                                                                                                                                                                                                                                                                                                                                                                    | Used to define the death date since we exclude children who had less than 9- year's follow-up time.                                                                                                           |
| Provincial Registry                               | Captures registration with the Alberta Health Care Insurance Plan which is the provincial health care plan available for nearly all residents in Alberta, including years of coverage, date of birth and gender.                                                                                                                                                                                                                                                            | Used to extract the birth-date, PHN, and sex of each child.                                                                                                                                                   |
